# Supplementary material for: Dual functional fluorescent sensor for selectively detecting acetone and Fe3+ based on {Cu2N4} substructure bridged Cu(i) coordination polymer
Source: Royal Society of Chemistry journal article supplement (doi:10.1039/c6ra23694d), 2016-01-01
Supplement: c6ra23694d1.pdf [file c6ra23694d1.pdf]

## Supporting Information

### **Dual functional fluorescent sensor for selectively detecting acetone and Fe<sup>3+</sup> based on {Cu<sub>2</sub>N<sub>4</sub>} substructure bridged Cu(I) coordination polymer**

Yang Song<sup>a</sup>, Ruiqing Fan<sup>\*,a</sup>, Xi Du<sup>a</sup>, Kai Xing<sup>a</sup>, Yuwei Dong<sup>a</sup>, Ping Wang<sup>a</sup>, and Yulin Yang<sup>\*,a</sup>

<sup>a</sup> *MIIT Key Laboratory of Critical Materials Technology for New Energy Conversion and Storage, School of Chemistry and Chemical Engineering, Harbin Institute of Technology, Harbin 150001, P. R. of China*

**Table S1** Selected luminescent compound materials for sensing acetone.

| No. | luminescent materials                                                                                                                                                                                                                                                                                            | solution              | detection limit               | ref                                                       |
|-----|------------------------------------------------------------------------------------------------------------------------------------------------------------------------------------------------------------------------------------------------------------------------------------------------------------------|-----------------------|-------------------------------|-----------------------------------------------------------|
| 1   | {[Cd <sub>3</sub> (L) <sub>2</sub> (H <sub>2</sub> O) <sub>6</sub> ]·1.5DMF}<br>(H <sub>3</sub> L=4,4',4''-(methylsilanetriyl)-<br>tribenzoic acid)                                                                                                                                                              | aqueous<br>solutions  | 3 vol%                        | <i>Chin. Chem. Lett.</i> 2016, <b>27</b> ,<br>497         |
| 2   | [Cd(Tipb)(pta) <sub>0.5</sub> (H <sub>2</sub> O)-(NO <sub>3</sub> )]·(DMF) <sub>x</sub><br>(H <sub>2</sub> O) <sub>y</sub><br>(Tipb=2,4,6-tris[4-(1Himidazole-1-<br>yl)]-benzene, pta = para-phthalate)                                                                                                          | acetonitrile          | 0.084vol%<br>decreased<br>83% | <i>J. Mater. Chem. A</i> , 2014, <b>2</b> ,<br>9469<br>by |
| 3   | [Cd(Tipb)(mta)]·(DMF) <sub>x</sub> (H <sub>2</sub> O) <sub>y</sub><br>(Tipb=2,4,6-tris[4-(1Himidazole-1-<br>yl)]-benzene, mta= meta-phthalate)                                                                                                                                                                   | acetonitrile          | 0.075vol%<br>decreased<br>94% | <i>J. Mater. Chem. A</i> , 2014, <b>2</b> ,<br>9469<br>by |
| 4   | {[Tb <sub>4</sub> (μ <sub>3</sub> -<br>OH) <sub>4</sub> (BPDC) <sub>3</sub> (BPDCA) <sub>0.5</sub> (H <sub>2</sub> O) <sub>6</sub> ]ClO <sub>4</sub><br>·5H <sub>2</sub> O<br>(BPDC <sup>2-</sup> = 3,3'-dicarboxylate-2,2'-<br>dipyridine anion and BPDCA <sup>2-</sup> =<br>biphenyl-4,4'-dicarboxylate anion) | EtOH                  | 21vol%                        | <i>J. Phys. Chem. C</i> 2014, <b>118</b> ,<br>416         |
| 5   | Ln(FBPT)(H <sub>2</sub> O)(DMF)<br>(Ln = Eu or Tb, FBPT = 2'-fluoro-<br>biphenyl-3,4',5-tricarboxylate)                                                                                                                                                                                                          | DMF                   | 5%                            | <i>J. Mater. Chem. A</i> 2013, <b>1</b> ,<br>11043        |
| 6   | Tb(BTC)(H <sub>2</sub> O) <sub>6</sub><br>(BTC = benzenetricarboxylate)                                                                                                                                                                                                                                          | aqueous<br>suspension | 0.3vol%                       | <i>J. Mater. Chem.</i> , 2012, <b>22</b> ,<br>6819.       |
| 7   | Cd <sub>3</sub> (L)(H <sub>2</sub> O) <sub>2</sub> (DMF) <sub>2</sub> ·5DMF<br>(H <sub>6</sub> L=hexa[4-<br>(carboxyphenyl)oxamethyl]-3-<br>oxapentane acid)                                                                                                                                                     | 1-propanol            | 0.1vol%                       | <i>J. Mater. Chem.</i> , 2012, <b>22</b> ,<br>23201.      |
| 8   | Cd <sub>3</sub> (L)(dib)·3H <sub>2</sub> O·5DMA<br>(H <sub>6</sub> L=hexa[4-<br>(carboxyphenyl)oxamethyl]-3-<br>oxapentane acid, dib = 1,4-bis(1-<br>imidazoly)benzene)                                                                                                                                          | 1-propanol            | 0.1vol%                       | <i>J. Mater. Chem.</i> , 2012, <b>22</b> ,<br>23201.      |
| 9   | Yb(BPT)(H <sub>2</sub> O)·(DMF) <sub>1.5</sub> (H <sub>2</sub> O) <sub>1.25</sub><br>(BPT = biphenyl-3,4',5-tricarboxylate)                                                                                                                                                                                      | 2-propanol            | 0.5vol%                       | <i>Chem. Commun.</i> 2011, <b>47</b> ,<br>5551            |
| 10  | Eu <sub>2</sub> (pzdc)(pzdc)(ox)(H <sub>2</sub> O) <sub>4</sub> ·8H <sub>2</sub> O                                                                                                                                                                                                                               | methanol              | 0.5vol%                       | <i>CrystEngComm</i> , 2010, <b>12</b> ,                   |

(pzdc = 2,5-pyrazinedicarboxylate,  
ox =oxalate)

4372.

|    |                                                                                                            |                       |            |                                           |
|----|------------------------------------------------------------------------------------------------------------|-----------------------|------------|-------------------------------------------|
| 11 | Eu(BTC)<br>(BTC = benzenetricarboxylate)                                                                   | DMF                   | 0.3 vol %  | <i>Adv. Mater.</i> 2007, <b>19</b> , 1693 |
| 12 | [Cu(tpp)•H <sub>2</sub> O] <sub>2n</sub><br>[Htp = 1-(4-tetrazol-5"-yl)benzyl-3 -<br>(pyraziny-1)pyrazole] | aqueous<br>suspension | 0.0842vol% | This work                                 |

**Table S2** Selected luminescent compound materials for sensing Fe<sup>3+</sup>.

| No. | luminescent materials                                                                                                                                                                                                                | solution                                                   | K <sub>sv</sub> / detection limit                                                                                            | ref                                                                   |
|-----|--------------------------------------------------------------------------------------------------------------------------------------------------------------------------------------------------------------------------------------|------------------------------------------------------------|------------------------------------------------------------------------------------------------------------------------------|-----------------------------------------------------------------------|
| 1   | Ba <sub>5</sub> (ADDA) <sub>5</sub> (EtOH) <sub>2</sub> (H <sub>2</sub> O) <sub>3</sub> ·5DMF<br>H <sub>2</sub> ADDA = 3,3'-(anthracene-9,10-diyl)<br>diacrylic acid                                                                 | methanol (turn-off)<br>acetone (turn-off)<br>THF (turn-on) | 1.68 × 10 <sup>4</sup> / 10 <sup>-6</sup> M<br>None/2.1 × 10 <sup>-7</sup> M<br>-9.09 × 10 <sup>3</sup> / 10 <sup>-6</sup> M | <i>Inorg. Chem.</i> 2016,<br><b>55</b> , 1782                         |
| 2   | {[Eu(L)(H <sub>2</sub> O) <sub>2</sub> ] · NMP · H <sub>2</sub> O} <sub>n</sub><br>(NMP = N-methyl-2-pyrrolidone)                                                                                                                    | DMF<br>HEPES                                               | 3.83 × 10 <sup>4</sup> / none<br>2.55 × 10 <sup>4</sup> / none                                                               | <i>Inorg. Chem.</i> 2016,<br><b>55</b> , 10114                        |
| 3   | {[Cd <sub>3</sub> (L) <sub>2</sub> (H <sub>2</sub> O) <sub>6</sub> ] · 1.5DMF}<br>(H <sub>3</sub> L=4,4',4''-(methylsilanetriyl)<br>tribenzoic acid)                                                                                 | aqueous solutions                                          | None / 1 × 10 <sup>-2</sup> M                                                                                                | <i>Chin. Chem. Lett.</i><br>2016, <b>27</b> , 497                     |
| 4   | {[Tb <sub>4</sub> (OH) <sub>4</sub> (DSOA) <sub>2</sub> (H <sub>2</sub> O) <sub>8</sub> ]·(H <sub>2</sub> O) <sub>8</sub> } <sub>n</sub><br>Na <sub>2</sub> H <sub>2</sub> DSOA=disodium-2,20-<br>disulfonate-4,4'-oxydibenzoic acid | aqueous solutions                                          | 3543 / none                                                                                                                  | <i>J. Mater. Chem. A.</i><br>2015, <b>3</b> , 641                     |
| 5   | [Tb(BTB)(DMF)]·1.5DMF·2.5H <sub>2</sub> O<br>(H <sub>3</sub> BTB = benzene-1,3,5-tribenzoate)                                                                                                                                        | ethanol                                                    | None / 10 <sup>-5</sup> M                                                                                                    | <i>Inorg. Chem.</i> 2015,<br><b>54</b> , 4585                         |
| 6   | EuL (L=2-aminoterephthalic acid)                                                                                                                                                                                                     | DMF                                                        | 2.88 × 10 <sup>4</sup> / none                                                                                                | <i>J. Mater. Chem. C,</i><br>2014, <b>2</b> , 6758                    |
| 7   | [H <sub>2</sub> N(CH <sub>3</sub> ) <sub>2</sub> ][Eu(H <sub>2</sub> O) <sub>2</sub> (BTMIPA)]·2H <sub>2</sub> O<br>O {H <sub>4</sub> BTMIPA = 5,5'-methylenebis-<br>(2,4,6-trimethylisophthalic acid)}                              | DMF                                                        | None / 10 <sup>-3</sup>                                                                                                      | <i>Chem. Commun.</i><br>2013, <b>49</b> , 11557                       |
| 8   | EuL <sub>3</sub><br>(L = 4'-(4-carboxyphenyl)-2,2': 6',2''-<br>terpyridine)                                                                                                                                                          | aqueous solution                                           | 4.1 × 10 <sup>3</sup> / 10 <sup>-4</sup> M                                                                                   | <i>ACS Appl. Mater.</i><br><i>Interfaces</i> 2013, <b>5</b> ,<br>1078 |
| 9   | [Eu(BTPCA)(H <sub>2</sub> O)]·2DMF·3H <sub>2</sub> O<br>(H <sub>3</sub> BTPCA = 1,1',1''-(benzene-1,3,5-                                                                                                                             | DMF                                                        | None / 10 <sup>-5</sup> M                                                                                                    | <i>Inorg. Chem.</i> 2013,<br><b>52</b> , 2799                         |

triy)tripiperidine-4-carboxylic acid

|    |                                                                                                                                      |                                           |                               |                                                   |
|----|--------------------------------------------------------------------------------------------------------------------------------------|-------------------------------------------|-------------------------------|---------------------------------------------------|
| 10 | MIL-53(AI)<br>(BDC =1,4-benzenedicarboxylic acid)                                                                                    | aqueous solution                          | None / $0.9 \times 10^{-6}$ M | <i>Anal. Chem.</i> 2013,<br><b>85</b> , 7441      |
| 11 | Eu(C <sub>33</sub> H <sub>24</sub> O <sub>12</sub> )(H <sub>2</sub> NMe)(H <sub>2</sub> O)                                           | HEPES aqueous                             | None / $10^{-4}$ M            | <i>J. Mater. Chem.</i><br>2012, <b>22</b> , 16920 |
| 12 | Eu(acac) <sub>3</sub> ·Zn(C <sub>15</sub> H <sub>12</sub> NO <sub>2</sub> ) <sub>2</sub>                                             | CH <sub>2</sub> Cl <sub>2</sub> /<br>MeOH | None / $5 \times 10^{-3}$ M   | <i>Chem. Commun.</i><br>2011, <b>47</b> , 10731   |
| 13 | [Cu(tp <sub>p</sub> )·H <sub>2</sub> O] <sub>2n</sub><br>[Htp <sub>p</sub> = 1-(4-tetrazol-5"-yl)benzyl-3 -<br>(pyraziny-l)pyrazole] | aqueous suspension                        | $4.6 \times 10^4 / 10^{-5}$ M | This work                                         |

**Table S3** Selected bond lengths [Å] and angles [°] for **1**.

| Bond length | (Å)      | Bond angle        | (°)        |
|-------------|----------|-------------------|------------|
| Cu(1)-N(3)  | 1.976(4) | N(3)-Cu(1)-N(8)   | 111.62(14) |
| Cu(1)-N(8)  | 2.028(4) | N(3)-Cu(1)-N(6)   | 124.47(15) |
| Cu(1)-N(6)  | 2.076(4) | N(8)-Cu(1)-N(6)   | 107.32(15) |
| Cu(1)-N(4)  | 2.130(4) | N(3)-Cu(1)-N(4)   | 120.93(15) |
| Cu(2)-N(10) | 2.005(4) | N(8)-Cu(1)-N(4)   | 109.28(14) |
| Cu(2)-N(16) | 2.009(4) | N(6)-Cu(1)-N(4)   | 78.90(14)  |
| Cu(2)-N(12) | 2.088(4) | N(10)-Cu(2)-N(16) | 110.79(15) |
| Cu(2)-N(14) | 2.116(3) | N(10)-Cu(2)-N(12) | 115.89(15) |
|             |          | N(16)-Cu(2)-N(12) | 113.66(16) |
|             |          | N(10)-Cu(2)-N(14) | 117.27(15) |
|             |          | N(16)-Cu(2)-N(14) | 117.16(15) |
|             |          | N(12)-Cu(2)-N(14) | 78.81(14)  |

**Table S4** Standard deviation calculation and detection limit calculation.

|                                 |              |
|---------------------------------|--------------|
| Text 1 Fluorescence intensity   | 5842.45 a.u. |
| Text 2 Fluorescence intensity   | 5842.02 a.u. |
| Text 3 Fluorescence intensity   | 5841.25 a.u. |
| Text 4 Fluorescence intensity   | 5841.88 a.u. |
| Text 5 Fluorescence intensity   | 5842.11 a.u. |
| Standard Deviation ( $\sigma$ ) | 0.4402       |
| Slope (m)                       | 1568.14      |

|                                 |             |
|---------------------------------|-------------|
| Detection limit ( $3\sigma/m$ ) | 0.0842 vol% |
|---------------------------------|-------------|

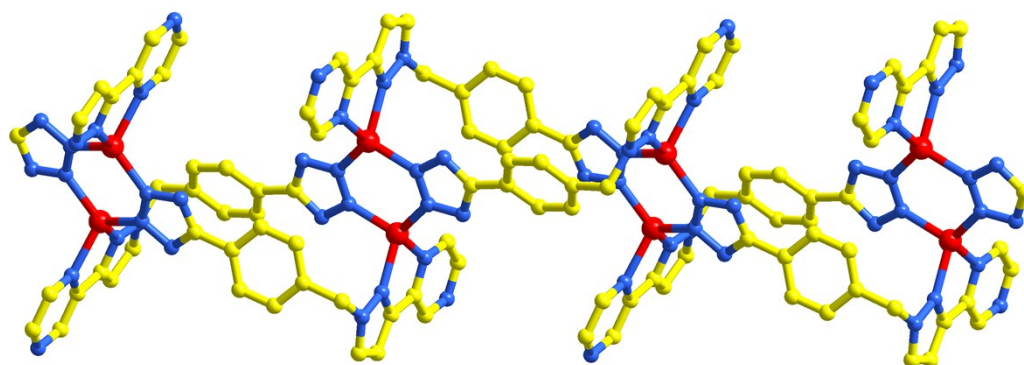

Fig. S1 The 1D chain structure of 1.

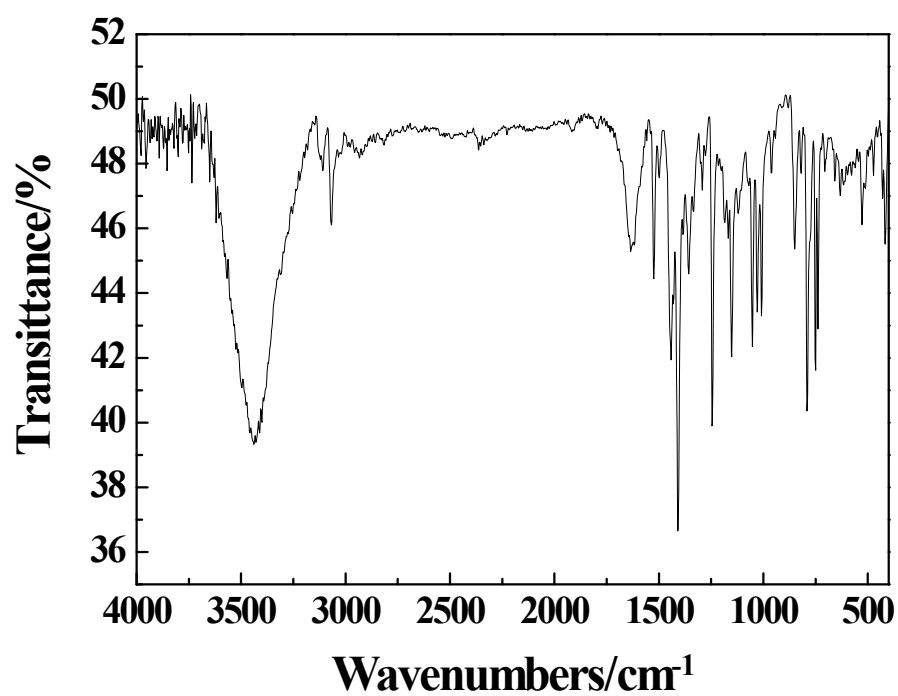

Fig.S2 The IR spectra of 1.

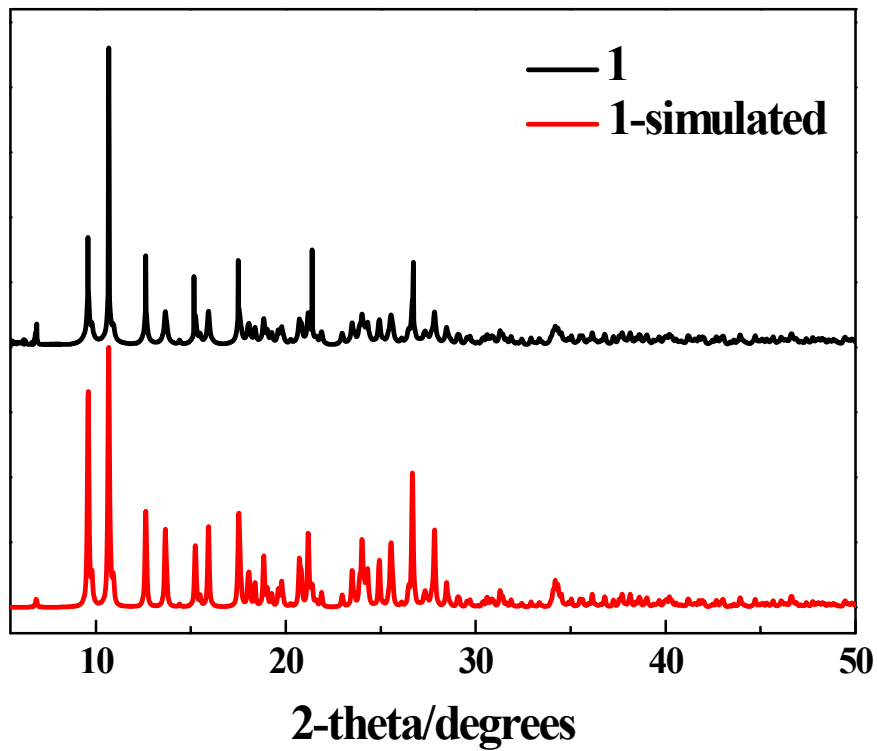

Fig.S3 The PXR D patterns of 1.

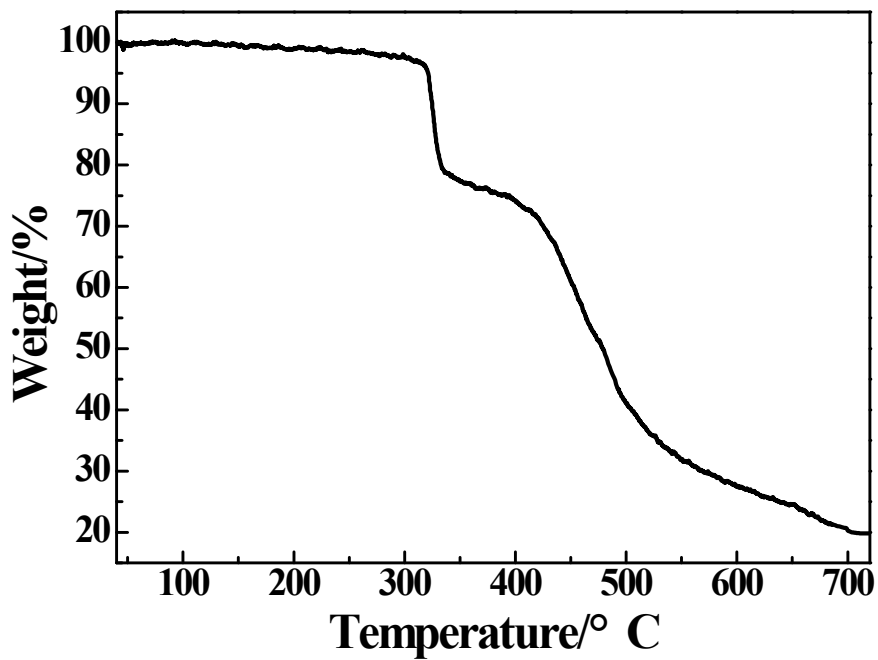

Fig.S4 The TGA curves of compounds 1.

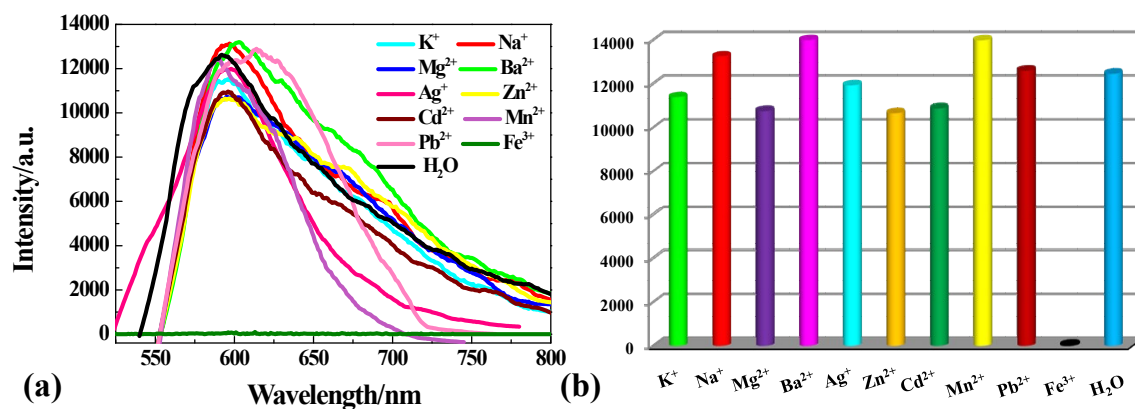

**Fig.S5** (a) Fluorescence intensity of compound **1** in different metal ion; (b) Results of the competition experiments between Fe<sup>3+</sup> and selected other metal ions.

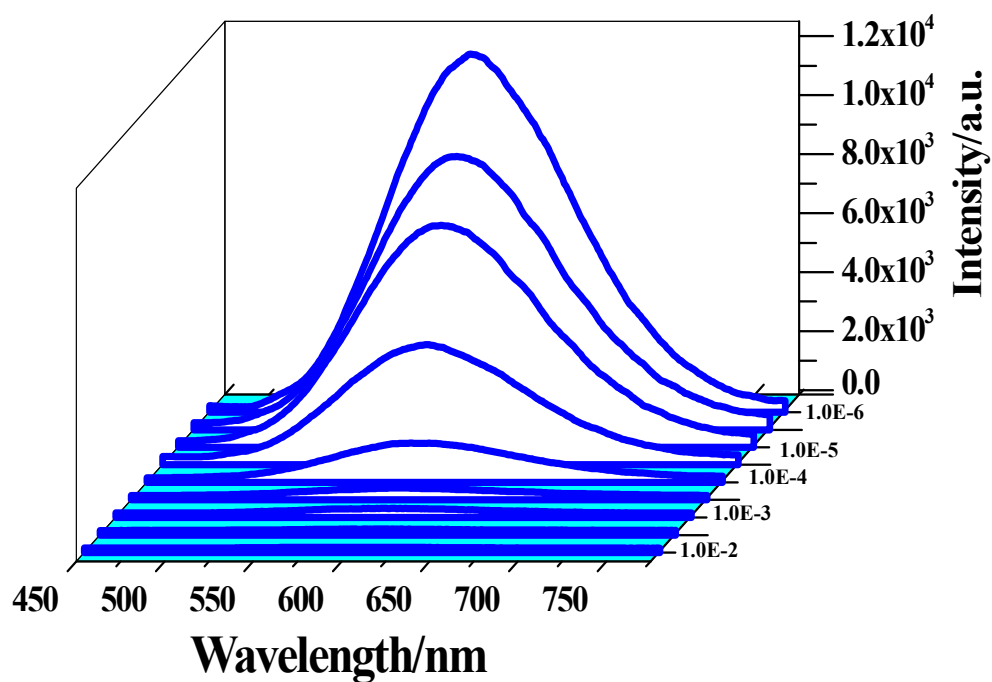

**Fig.S6** Fluorescence intensity of compound **1** at 597 nm in different concentrations aqueous solutions of Fe<sup>3+</sup> (in the range of approximately 10<sup>-6</sup>–10<sup>-2</sup> mol/L).
